# Supplementary material for: A smart triboelectric nanogenerator with tunable rheological and electrical performance for self-powered multi-sensors
Source: Royal Society of Chemistry journal article supplement (doi:10.1039/c9tc05969e), 2020-01-01
Supplement: c9tc05969e5.pdf [file c9tc05969e5.pdf]

## Supporting Information

### **Smart triboelectric nanogenerator with tunable rheological and electrical performance towards self-powered multi-sensor**

*Sheng Wang, Fang Yuan, Shuai Liu, Jianyu Zhou, Shouhu Xuan, Yu Wang\*, and  
Xinglong Gong\**

*\*CAS Key Laboratory of Mechanical Behavior and Design of Materials, Department of Modern Mechanics, CAS Center for Excellence in Complex System Mechanics, University of Science and Technology of China (USTC), Hefei 230027, P. R. China*

*\*Corresponding author: Tel: 86-551-63601702; Fax: 86-551-63600419.*

*E-mail: wyu@ustc.edu.cn (Y.Wang)*

*gongxl@ustc.edu.cn (X.L. Gong)*

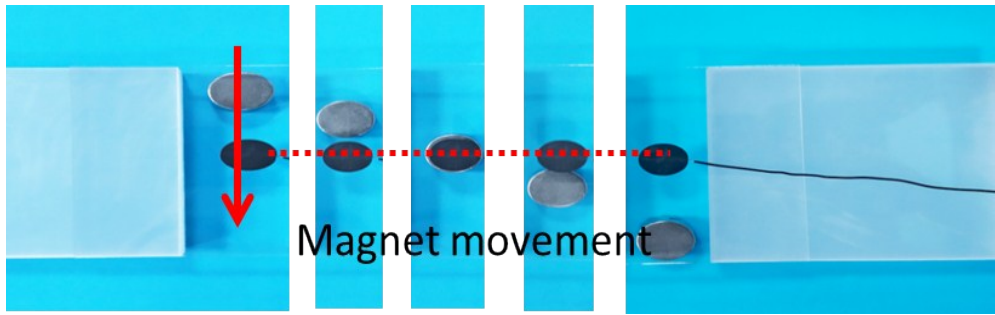

**Fig. S1** the movement direction of magnet

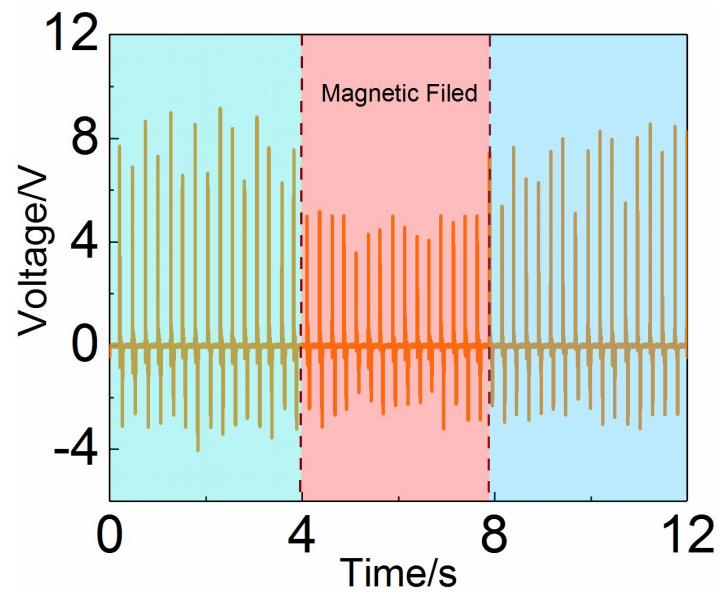

**Fig. S2** the sensing response of TENG to magnetic field when a magnet passes the TENG quickly

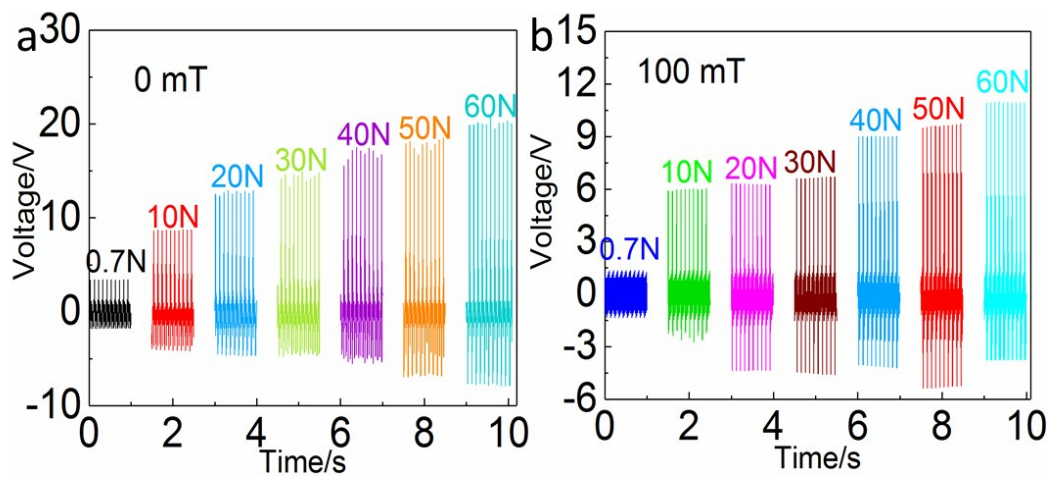

**Fig. S3** Typical voltage-time curves under 0.7-60 N loading force with the magnetic fields of (a) 0 mT and (h) 100 mT

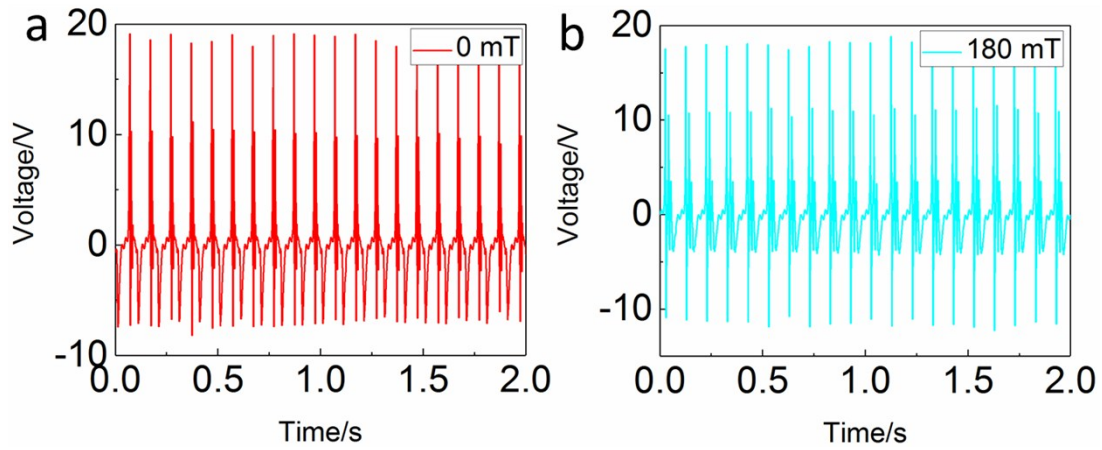

**Fig. S4** Output voltages of pure SSE-based TENG under the magnetic fields of (a) 0 mT and (b) 180 mT with the compression force of 50 N

**Table S1** Load resistance dependent triboelectric performance of SSE-60% based TENG device.

| Resistance/ $\Omega$ | Average Voltage/V | Average Power/ $\mu$ W |
|----------------------|-------------------|------------------------|
| 1k                   | 0.0012            | 0.15                   |
| 5k                   | 0.029             | 0.17                   |
| 100k                 | 0.55              | 3.03                   |
| 500k                 | 2.40              | 1.84                   |
| 1M                   | 4.96              | 24.72                  |
| 3M                   | 10.49             | 36.86                  |
| 5M                   | 14.90             | 44.46                  |
| 8M                   | 20.20             | 51.05                  |
| 10M                  | 21.48             | 46.31                  |
| 50M                  | 26.16             | 13.68                  |
| 100M                 | 27.38             | 7.51                   |
| 500M                 | 34.55             | 2.39                   |
| 1G                   | 37.96             | 1.44                   |

**Table S2** Positive triboelectric performance of TENG under the loading of compression forces

| Loading forces/N | 0.7  | 10   | 20    | 30    | 40    | 50    | 60    |
|------------------|------|------|-------|-------|-------|-------|-------|
| Voltages/V       | 3.43 | 8.75 | 12.94 | 14.97 | 17.62 | 18.52 | 20.98 |

**Table S3** Negative triboelectric performance of TENG under different magnetic fields with the loading force of 60 N

| Magnetic field/mT | 0     | 45    | 105   | 145  | 190  |
|-------------------|-------|-------|-------|------|------|
| Voltages/V        | 29.98 | 17.13 | 11.02 | 3.32 | 1.81 |
